# Supplementary material for: Molecular Genetic Analysis with Microsatellite-like Loci Reveals Specific Dairy-Associated and Environmental Populations of the Yeast Geotrichum candidum
Source: MDPI journal article supplement (doi:10.3390/microorganisms10010103), 2022-01-04
Supplement: s1 [file s1]

**Table S1.** Microsatellites-like loci chosen for molecular typing: positions, properties and oligonucleotides used for amplification from the genomic DNA.

| Microsatellite name | Scaffold number | Start base of microsatellite sequence | End base of microsatellite sequence | Context    | Repeat motif | Predicted amplicon length (repetitions) <sup>a</sup> | Oligonucleotide pair used for amplification | Sequences of oligonucleotides                       |
|---------------------|-----------------|---------------------------------------|-------------------------------------|------------|--------------|------------------------------------------------------|---------------------------------------------|-----------------------------------------------------|
| ML005               | 3               | 1696696                               | 1696985                             | CDS        | GTT          | 290<br>(53)                                          | A5<br>A6                                    | GCAACACTGACTGACGCTTA<br>TCGTGACTCAGTTATGTCGGA       |
| ML007               | 7               | 1166738                               | 1167075                             | CDS        | TGT          | 338<br>(81)                                          | A7<br>A8                                    | AGGATCCATTTGAATTGTACTTGA<br>CCAGCCCCTAAACAATGCAAATA |
| ML011               | 16              | 358561                                | 358830                              | CDS        | CAA          | 270<br>(58)                                          | B3<br>B4                                    | ATCAGCGCTCGACACACT<br>AAGGCTGTGGTGGGGC              |
| ML013               | 17              | 424091                                | 424415                              | CDS        | CAA          | 325<br>(79)                                          | B5<br>B6                                    | GCAGGGACAAGAACAATACCC<br>AGCAGCATGGAGTTGGCT         |
| ML027               | 5               | 514292                                | 514635                              | CDS        | TTG          | 344<br>(97)                                          | D3<br>D4                                    | TCAAGGGCAAGCAACTTCAG<br>GCCATTGATAGAGCTTGCCC        |
| ML037               | 12              | 666111                                | 666397                              | CDS        | CAA          | 287<br>(68)                                          | E5<br>E6                                    | CATCTCCGCTCGTACTCAGA<br>TGTGGCTGTGGTTGTTGAAG        |
| ML041               | 20              | 64551                                 | 64869                               | CDS        | CAG          | 319<br>(83)                                          | F1<br>F2                                    | CCGCCCCAGATGCTTCT<br>GCTGGAAGTGTGGTCTTTGA           |
| ML047               | 1               | 253966                                | 254280                              | intergenic | AAG          | 315<br>(78)                                          | F7<br>F8                                    | TGGTTTATTGACGAAGTAGACCG<br>CCCACTGGCTGCTTTTACTC     |
| ML055               | 8               | 20524                                 | 20813                               | intergenic | ATA          | 290<br>(59)                                          | G7<br>G8                                    | AGGTGTGTAGTTCTAATGGCAATT<br>TCGAAATTAAAGATGGAAGCCCC |
| ML067               | 7               | 476425                                | 476612                              | CDS        | CAA          | 188<br>(44)                                          | I3<br>I4                                    | ACAGATGCAGATGTTGTACCAG<br>CTGACTGTTCCGGCTGAGA       |
| ML069               | 15              | 234615                                | 234771                              | CDS        | TCA          | 157<br>(37)                                          | I5<br>I6                                    | TGGATGTATCTCTAGGCCGC<br>AACAACCAACAACAGCAGCA        |
| ML075               | 4               | 1312567                               | 1312717                             | intergenic | TTA          | 151<br>(32)                                          | A3<br>A4                                    | ACCGTGCTGTTTTATTGTC<br>AAAAGTCGACACGGGAGACA         |
| ML097               | 19              | 422927                                | 423122                              | intergenic | AAT          | 196<br>(27)                                          | D1<br>D2                                    | CCATGGCTTTACTTGACCA<br>GCCGAACCGATCAGCCATA          |

<sup>a</sup> Lengths in bases and number of repetitions present at the locus (in parentheses) are for amplicons from the type strain CLIB 918
