# Supplementary material for: Molecular Genetic Analysis with Microsatellite-like Loci Reveals Specific Dairy-Associated and Environmental Populations of the Yeast Geotrichum candidum
Source: MDPI journal article supplement (doi:10.3390/microorganisms10010103), 2022-01-04
Supplement: s1 [file s1]

**Table S4.** Strains used in this study.

|            | Presence of the strain's allele at a given locus in the other strains * |            |            |            |            |            |            |                     |            |            |            |            |
|------------|-------------------------------------------------------------------------|------------|------------|------------|------------|------------|------------|---------------------|------------|------------|------------|------------|
| Strain     | ML005                                                                   | ML007      | ML011      | ML013      | ML027      | ML037      | ML041      | ML047               | ML055      | ML067      | ML075      | ML097      |
| CBS 11628  | <b>0.0</b>                                                              | <b>0.0</b> | <b>0.1</b> | <b>0.1</b> | 0.3        | <b>0.2</b> | 4.4        | 0.4                 | 0.3        | 0.4        | -          | <b>0.0</b> |
| CBS 557.83 | <b>0.0</b>                                                              | 1.0        | 1.1        | <b>0.0</b> | 0.3        | <b>0.2</b> | <b>0.0</b> | 0.4                 | 0.3        | <b>0.0</b> | -          | <b>0.0</b> |
| CBS 476.83 | <b>0.0</b>                                                              | <b>0.0</b> | <b>0.1</b> | <b>0.1</b> | 0.3        | <b>0.2</b> | <b>0.2</b> | 0.4                 | 0.3        | <b>0.0</b> | -          | <b>0.0</b> |
| CLIB 1154  | <b>0.0</b>                                                              | <b>0.0</b> | <b>0.1</b> | <b>0.1</b> | 0.3        | <b>0.0</b> | <b>0.1</b> | 0.4                 | 0.3        | <b>0.0</b> | -          | <b>0.0</b> |
| NT 12      | <b>0.0</b>                                                              | <b>0.0</b> | <b>0.1</b> | <b>0.1</b> | <b>0.0</b> | <b>0.0</b> | <b>0.1</b> | 0.4                 | <b>0.0</b> | <b>0.0</b> | -          | <b>0.0</b> |
| CBS 9194   | 2.1                                                                     | <b>0.0</b> | <b>0.0</b> | <b>0.0</b> | <b>0.1</b> | <b>0.0</b> | <b>0.1</b> | <b>0.0</b>          | <b>0.0</b> | <b>0.0</b> | 2.2        | <b>0.1</b> |
| MUCL 14462 | <b>0.0</b>                                                              | <b>0.0</b> | <b>0.0</b> | <b>0.0</b> | <b>0.1</b> | <b>0.0</b> | <b>0.1</b> | <b>0.0</b>          | <b>0.0</b> | <b>0.0</b> | <b>0.0</b> | <b>0.1</b> |
| MUCL 8652  | 4.6                                                                     | 3.1        | <b>0.0</b> | <b>0.0</b> | 0.4        | <b>0.0</b> | 4.4        | 1.2                 | <b>0.0</b> | <b>0.0</b> | 0.9        | <b>0.0</b> |
| CBS 178.71 | <b>0.0</b>                                                              | 0, 0       | 11.4       | <b>0.0</b> | 0, 1.7     | <b>0.0</b> | 3.7        | 0, 1.2              | 1.3        | 0, 0.2     | <b>0.2</b> | <b>0.0</b> |
| CLIB 1258  | 1.5                                                                     | 3.0        | 11.3       | 1.4        | 3.4        | 7.6        | <b>0.1</b> | 1.1                 | 1.0        | 3.6        | <b>0.0</b> | 11.6       |
| FM 03      | 4.5                                                                     | 3.0        | 11.3       | 1.4        | 3.4        | 7.6        | 4.3        | 1.1                 | 1.2        | 3.6        | 0.8        | 11.6       |
| FM 122     | 1.5                                                                     | <b>0.0</b> | 11.3       | <b>0.0</b> | 3.4        | 7.6        | 3.6        | <b>0.0</b>          | 1.0        | 3.6        | 0.8        | 11.6       |
| FM 115     | <b>0.2</b>                                                              | 0.3        | 11.3       | <b>0.2</b> | 0.3        | 7.6        | 3.6        | 1.1                 | 1.0        | 0.3        | 0.8        | 11.6       |
| NBRC 5368  | <b>0.2</b>                                                              | 3.0        | 11.3       | <b>0.0</b> | 0.3        | 7.6        | <b>0.0</b> | 1.1                 | 1.0        | 3.6        | -          | 11.6       |
| LCP 51.590 | 4.5                                                                     | 3.0        | 11.4       | 1.4        | 3.4        | 7.6        | 3.6        | 10.3                | <b>0.2</b> | <b>0.0</b> | 0.9        | 11.6       |
| MUCL 11539 | <b>0.0</b>                                                              | 3.0        | 11.4       | <b>0.0</b> | 3.4        | 7.6        | 3.6        | 10.3,<br><b>0.0</b> | <b>0.2</b> | <b>0.1</b> | 2.2        | 11.6       |
| CBS 117138 | 4.5                                                                     | 3.0        | <b>0.2</b> | 1.1        | 3.4        | 7.6        | 3.6        | 10.3                | 4.4        | <b>0.0</b> | -          | 11.6       |
| VTTTC 4559 | 4.5                                                                     | 3.0        | <b>0.2</b> | 1.1        | 3.4        | 7.6        | 3.6        | 10.3                | 1.0        | <b>0.2</b> | 2.2        | <b>0.0</b> |

|           |            |                           |            |            |            |     |     |            |     |            |            |                     |
|-----------|------------|---------------------------|------------|------------|------------|-----|-----|------------|-----|------------|------------|---------------------|
| DSM 13629 | 4.5        | 3.0                       | <b>0.0</b> | 0.4        | 3.4        | 1.5 | 3.6 | 10.3       | 4.4 | <b>0.2</b> | <b>0.2</b> | 11.6                |
| FM 212    | <b>0.2</b> | 3.0                       | 11.4       | <b>0.2</b> | 3.4        | 7.6 | 4.3 | 10.3       | 4.4 | 0.3        | <b>0.0</b> | 11.6                |
| CNRZ 820  | <b>0.0</b> | 2.7                       | 11.0       | 1.3        | 3.1        | 7.3 | 4.1 | 9.9        | 0.8 | 3.3        | 3.6        | 11.3                |
| CLIB 1285 | 1.2        | <b>0.0</b>                | 11.0       | 5.4        | 3.1        | 7.3 | 4.0 | 9.9        | 0.9 | 3.3        | 3.6        | 11.3                |
| CLIB 1237 | 1.6        | <b>0.0</b>                | 11.4       | <b>0.2</b> | 1.7        | 7.7 | 4.4 | 10.3       | 1.3 | 3.7        | 2.2        | 11.6                |
| CLIB 1249 | <b>0.0</b> | <b>0.0</b>                | 11.4       | 1.1        | 1.7        | 7.7 | 4.4 | 10.3       | 1.3 | <b>0.0</b> | 3.9        | <b>0.0,</b><br>11.6 |
| CLIB 1251 | <b>0.1</b> | 0.4                       | 11.4       | 1.1        | 1.7        | 3.4 | 4.4 | 10.3       | 2.6 | 3.7        | 0.5        | 11.6                |
| CLIB 1252 | <b>0.1</b> | 0.4                       | 11.4       | 1.1        | 1.7        | 3.4 | 4.4 | 10.3       | 2.6 | 3.7        | 0.5        | 11.6                |
| CLIB 1263 | 4.5        | 0.4                       | 11.4       | 1.1        | 1.7        | 7.7 | 4.4 | 10.3       | 1.2 | 3.7        | 0.5        | 11.6                |
| CNRZ 823  | 4.5        | <b>0.0</b>                | 11.4       | 1.1        | 1.7        | 7.7 | 4.4 | 10.3       | 4.5 | 3.7        | 2.2        | 11.6                |
| CLIB 1257 | 4.5        | <b>0.0</b>                | 11.4       | 1.7        | 6.4        | 7.7 | 4.4 | 10.3       | 2.6 | 3.7        | 0.3        | 11.6                |
| CLIB 1260 | 4.5        | <b>0.0</b>                | 11.4       | 1.7        | 6.4        | 7.7 | 4.4 | 10.3       | 1.3 | 3.7        | 0.3        | 11.6                |
| DSM 10452 | 4.5        | <b>0.0</b>                | 11.4       | 0.4        | <b>0.0</b> | 7.6 | 3.6 | <b>0.0</b> | 2.5 | 6.1        | 0.9        | 11.6                |
| FM 30     | 0.9        | <b>0.0</b>                | 11.4       | 0.4        | 6.3        | 7.6 | 3.6 | 10.3       | 1.0 | 6.1        | 2.2        | 11.6                |
| FM 213    | <b>0.0</b> | <b>0.2,</b><br><b>0.2</b> | 11.4       | 1.7        | 6.3        | 7.6 | 4.3 | 10.3       | 1.1 | 6.1        | 1.2        | 11.6                |
| FM 214    | 4.5        | <b>0.2</b>                | 11.4       | 1.7        | 6.3        | 7.6 | 4.3 | 10.3       | 1.1 | 6.1        | 1.2        | 11.6                |
| CLIB 1262 | 1.5        | <b>0.2</b>                | 11.4       | 1.7        | 6.3        | 7.6 | 3.6 | 10.3       | 1.1 | 6.1        | 1.2        | 11.6                |
| CLIB 918  | 1.5        | <b>0.2</b>                | 11.4       | 1.7        | 6.3        | 7.6 | 3.6 | 10.3       | 1.1 | 6.1        | 1.2        | 11.6                |
| CLIB 1242 | 0.6        | 3.1                       | 11.5       | 5.8        | 6.4        | 3.4 | 4.4 | 10.4       | 4.5 | 6.2        | 4.0        | 11.7                |
| CLIB 1253 | 0.6        | 3.1                       | 11.5       | 5.8        | 6.4        | 3.4 | 4.4 | 10.4       | 4.5 | 6.2        | 4.0        | 11.7                |

|           |     |            |                     |            |             |     |     |            |     |     |            |      |
|-----------|-----|------------|---------------------|------------|-------------|-----|-----|------------|-----|-----|------------|------|
| CLIB 1243 | 0.6 | 3.1        | 11.5                | 5.8        | 6.4         | 3.4 | 4.4 | 10.4       | 4.5 | 6.2 | 4.0        | 11.7 |
| CLIB 1255 | 0.6 | 3.1        | 11.5                | 5.8        | 6.4         | 3.4 | 4.4 | 10.4       | 4.5 | 6.2 | 4.0        | 11.7 |
| CLIB 1256 | 0.6 | 3.1        | 1.1                 | 5.8        | 6.4         | 3.4 | 4.4 | 10.4       | 4.5 | 6.2 | 4.0        | 11.7 |
| CNRZ 822  | 0.6 | 3.1        | 11.5                | 5.8        | 6.4         | 3.4 | 4.4 | <b>0.0</b> | 4.5 | 6.2 | 4.0        | 11.7 |
| FM 29     | 0.3 | 3.1        | 11.5                | 5.8        | 6.4         | 3.4 | 4.4 | 10.4       | 4.5 | 6.2 | 4.0        | 11.7 |
| CLIB 1240 | 0.6 | 3.1        | 11.5                | 5.8        | 6.4         | 1.6 | 4.4 | 10.4       | 4.5 | 6.2 | 4.0        | 11.7 |
| FM 12     | 0.6 | 3.1        | 11.5                | 5.8        | 6.4         | 1.6 | 4.4 | 10.4       | 4.5 | 6.2 | 4.0        | 11.7 |
| FM 31     | 0.6 | 3.1        | 11.5                | 5.8        | 6.4         | 1.6 | 4.4 | 10.4       | 4.5 | 6.2 | 4.0        | 11.7 |
| EL13-B1-3 | 2.1 | 3.1        | 11.5                | 5.8        | 6.4,<br>1.7 | 1.6 | 4.4 | 10.4       | 4.5 | 6.2 | 4.0        | 11.7 |
| CLIB 1244 | 0.3 | 3.1        | 11.5                | 5.8        | 6.4         | 1.6 | 4.4 | 10.4       | 4.5 | 6.2 | 4.0        | 11.7 |
| CLIB 1245 | 0.3 | 3.1        | 11.5                | 5.8        | 6.4         | 1.6 | 4.4 | 10.4       | 4.5 | 6.2 | 4.0        | 11.7 |
| CLIB 1247 | 0.3 | 3.1        | 11.5                | 5.8        | 6.4         | 1.6 | 4.4 | 10.4       | 4.5 | 6.2 | 4.0        | 11.7 |
| CLIB 1246 | 0.3 | 3.1        | 11.5                | <b>0.0</b> | 6.4         | 1.6 | 4.4 | 10.4       | 4.5 | 6.2 | 4.0        | 11.7 |
| CLIB 1254 | 1.2 | <b>0.0</b> | 10.5,<br><b>0.2</b> | 4.9        | 5.5         | 0.7 | 3.5 | 9.4        | 0.4 | 5.2 | <b>0.2</b> | 10.8 |
| CLIB 1270 | 3.7 | <b>0.1</b> | 10.5                | 4.9        | 5.5         | 6.8 | 2.8 | 9.4        | 3.6 | 5.2 | 3.1        | 10.8 |
| CNRZ 821  | 0.9 | 0.3        | 11.4                | 0.4        | 0.6         | 7.6 | 4.4 | 10.3       | 4.5 | 6.1 | 1.2        | 11.6 |
| FM 77     | 0.9 | 0.3        | 11.4                | 0.4        | 0.6         | 7.6 | 4.4 | 10.3       | 4.5 | 6.1 | 1.2        | 11.6 |
| FM 76     | 0.9 | <b>0.0</b> | 11.4                | 0.4        | 0.6         | 7.6 | 4.4 | 10.3       | 4.5 | 6.1 | 1.2        | 11.6 |
| CNRZ 818  | 0.9 | <b>0.0</b> | 11.4                | 0.4        | 0.6         | 7.6 | 4.4 | 10.3       | 1.3 | 6.1 | 1.2        | 11.6 |
| FM 269    | 4.5 | <b>0.0</b> | 11.4                | 5.7        | 0.6         | 7.6 | 4.4 | 10.3       | 4.5 | 6.1 | 1.2        | 11.6 |

|            |             |                           |      |             |             |             |             |      |             |                    |            |            |
|------------|-------------|---------------------------|------|-------------|-------------|-------------|-------------|------|-------------|--------------------|------------|------------|
| CLIB 1239  | 4.5         | 0.3                       | 11.4 | 1.1         | 6.4         | 7.6         | 4.4         | 10.3 | 1.3         | 6.1                | 2.2        | 11.6       |
| CLIB 1241  | 4.5         | 0.3                       | 11.4 | 1.1         | 6.4         | 7.6         | 4.4         | 10.3 | 4.5         | 6.1                | 2.2        | 11.6       |
| CLIB 1284  | 0.3         | <b>0.0</b>                | 11.3 | 1.6         | 1.6         | 7.6         | 4.4         | 1.1  | 2.5         | 6.0                | 1.0        | 11.6       |
| NCYC 49    | 0.3         | <b>0.0</b>                | 11.3 | 1.6         | 1.6         | 3.3         | 3.6         | 10.2 | 4.4         | 6.0                | 2.1        | 11.6       |
| CLIB 1236  | 0.9         | 0.4                       | 11.3 | 5.7         | 1.6         | 3.3         | 3.6         | 10.2 | 2.5         | 6.0                | 0.4        | 11.6       |
| MUCL 881   | 1.5         | 0.3                       | 11.3 | 5.7         | 1.6         | 3.3         | 3.6         | 10.2 | 2.5         | <b>0.0</b>         | -          | 11.6       |
| FM 267     | <b>0.2</b>  | <b>0.2,</b><br><b>0.1</b> | 11.3 | 5.7         | 6.3         | 3.3         | 3.6         | 10.2 | 2.5         | <b>0.0</b>         | <b>0.1</b> | 11.6       |
| FM 119     | 3.7,<br>1.2 | <b>0.1</b>                | 10.5 | 4.9,<br>0.6 | 5.5,<br>2.6 | 2.5,<br>6.8 | 3.6,<br>3.5 | 9.4  | 1.7,<br>3.6 | 2.8, 0             | 1.3        | 10.8       |
| CBS 11176  | 4.6         | <b>0.0</b>                | 11.5 | 5.8         | 6.4         | 3.4         | 4.5         | 10.4 | <b>0.0</b>  | 6.2                | 4.0        | 11.7       |
| CLIB 1267  | 4.6         | <b>0.1</b>                | 11.5 | 5.8         | 6.4         | 3.4         | 4.5         | 1.2  | 1.4         | 6.2                | 4.0        | 11.7       |
| CLIB 1235  | 0.4         | <b>0.0</b>                | 11.5 | 5.8         | 6.4         | 3.4         | 4.5, 0      | 10.4 | 1.4         | 6.2                | 4.0        | 11.7       |
| CNRZ 819   | 1.6         | <b>0.1</b>                | 11.5 | 5.8         | 6.4         | 3.4         | 4.5         | 10.4 | 2.6         | 6.2                | 4.0        | 11.7       |
| CBS 615.84 | 4.6,<br>1.6 | 0, 0.1                    | 11.5 | 5.8         | 6.4,<br>1.7 | 3.4         | 4.5         | 10.4 | 1.4         | 6.2,<br><b>0.0</b> | 4.0        | 11.7       |
| CBS 182.33 | 1.0         | <b>0.0</b>                | 11.5 | 5.8         | 6.4         | 3.4         | 4.4         | 10.4 | 2.6         | 6.2                | 4.0        | 11.7       |
| CLIB 1248  | 1.0         | <b>0.0</b>                | 11.5 | 5.8         | 6.4         | 3.4         | 4.5         | 10.4 | <b>0.0</b>  | 6.2                | 4.0        | 11.7       |
| CLIB 1283  | 0.6         | 1.0                       | 11.5 | 5.8         | 6.4         | 3.4         | 4.5         | 10.4 | 4.5         | <b>0.1</b>         | 4.0        | 11.7       |
| FM 270     | 0.3         | <b>0.0</b>                | 11.5 | 5.8         | 6.4         | 3.4         | <b>0.0</b>  | 10.4 | 2.6         | <b>0.1</b>         | 4.0        | 11.7       |
| FM 125     | 4.6         | <b>0.1</b>                | 11.5 | 0.3         | 6.4         | 3.4         | 4.5         | 10.4 | 1.4         | 6.2                | 4.0        | <b>0.0</b> |
| FM 34      | 4.6         | <b>0.1</b>                | 11.5 | 0.3         | 6.4         | 3.4         | 4.5         | 10.4 | 2.6         | 6.2                | 4.0        | 11.7       |

|           |            |            |      |            |     |     |     |            |     |            |     |      |
|-----------|------------|------------|------|------------|-----|-----|-----|------------|-----|------------|-----|------|
| FM 268    | 4.6        | <b>0.2</b> | 11.5 | 0.3        | 6.4 | 3.4 | 4.5 | 10.4       | 2.6 | <b>0.0</b> | 4.0 | 11.7 |
| CLIB 1274 | <b>0.0</b> | <b>0.0</b> | 11.5 | 5.8        | 6.4 | 3.4 | 4.5 | 10.4       | 1.4 | 3.7        | 0.6 | 11.7 |
| FM 136    | <b>0.0</b> | <b>0.3</b> | 11.5 | <b>0.5</b> | 0.7 | 3.4 | 4.5 | <b>0.0</b> | 1.1 | 3.7        | 4.0 | 11.7 |

\*) For each allele of each strain the presence or absence in the other 79 strains was quantified. Each correspondence between the allele of the index strain and that of one of the other strains was normalized with respect to the number of strains comprising the subject strain's clade as defined in figure 1, in order to account for over-, or under-sampling of the different clades. Since 13 groups are defined (9 large clades and 4 one- or two-strain groups), the maximum possible value is 13; the average value was 4.5. Values less than 5% of the average are highlighted in bold print. Strains are presented in the order of clades defined in figure 1.
