# Supplementary material for: Molecular Genetic Analysis with Microsatellite-like Loci Reveals Specific Dairy-Associated and Environmental Populations of the Yeast Geotrichum candidum
Source: MDPI journal article supplement (doi:10.3390/microorganisms10010103), 2022-01-04
Supplement: s1 [file s1]

**Table S3.** Corrected lengths of microsatellite loci.

| Strain     | Length (bases) of amplicon produced at the microsatellite locus * |             |             |       |             |       |             |             |       |             |       |       |             |
|------------|-------------------------------------------------------------------|-------------|-------------|-------|-------------|-------|-------------|-------------|-------|-------------|-------|-------|-------------|
|            | ML005                                                             | ML007       | ML011       | ML013 | ML027       | ML037 | ML041       | ML047       | ML055 | ML067       | ML069 | ML075 | ML097       |
| CBS 11176  | 293                                                               | 414         | 266         | 356   | 339         | 265   | 307         | 309         | 223   | 183         | 158   | 160   | 196         |
| CBS 11628  | 422                                                               | 392         | 292         | 386   | 351         | 259   | 318         | 290         | 253   | 207         | 158   | -     | 263         |
| CBS 117138 | 293                                                               | 261         | 278         | 354   | 363         | 283   | 312         | 309         | 266   | 201         | 158   | -     | 196         |
| CBS 178.71 | 286                                                               | 241,<br>277 | 266         | 392   | 336,<br>374 | 289   | 312         | 296,<br>309 | 266   | 171,<br>216 | 158   | 145   | 265         |
| CBS 182.33 | 299                                                               | 464         | 266         | 356   | 339         | 265   | 318         | 309         | 257   | 183         | 158   | 160   | 196         |
| CBS 476.83 | 453                                                               | 308         | 295         | 389   | 351         | 259   | 321         | 290         | 253   | 269         | 158   | -     | 226         |
| CBS 557.83 | 394                                                               | 345         | 286         | 380   | 351         | 259   | 315         | 290         | 253   | 180         | 158   | -     | 238         |
| CBS 615.84 | 293,<br>296                                                       | 361,<br>461 | 266         | 356   | 339,<br>374 | 265   | 307         | 309         | 257   | 183,<br>260 | 158   | 160   | 196         |
| CBS 9194   | 302                                                               | 282         | 280         | 328   | 360         | 303   | 275         | 280         | 328   | 337         | 158   | 145   | 206         |
| CLIB 1154  | 459                                                               | 453         | 295         | 389   | 351         | 286   | 332         | 290         | 253   | 213         | 158   | -     | 259         |
| CLIB 1235  | 312                                                               | 338         | 266         | 356   | 339         | 265   | 307,<br>365 | 309         | 257   | 183         | 152   | 160   | 196         |
| CLIB 1236  | 299                                                               | 342         | 266         | 356   | 374         | 265   | 312         | 309         | 257   | 183         | 158   | 163   | 196         |
| CLIB 1237  | 296                                                               | 367         | 266         | 359   | 374         | 283   | 307         | 309         | 257   | 189         | 158   | 145   | 196         |
| CLIB 1239  | 293                                                               | 364         | 266         | 354   | 339         | 283   | 307         | 309         | 266   | 183         | 158   | 145   | 196         |
| CLIB 1240  | 302                                                               | 261         | 266         | 356   | 339         | 286   | 318         | 309         | 266   | 183         | 158   | 160   | 196         |
| CLIB 1241  | 293                                                               | 364         | 266         | 354   | 339         | 283   | 307         | 309         | 266   | 183         | 158   | 145   | 196         |
| CLIB 1242  | 302                                                               | 261         | 266         | 356   | 339         | 265   | 318         | 309         | 266   | 183         | 158   | 160   | 196         |
| CLIB 1243  | 302                                                               | 261         | 266         | 356   | 339         | 265   | 318         | 309         | 266   | 183         | 158   | 160   | 196         |
| CLIB 1244  | 306                                                               | 261         | 266         | 356   | 339         | 286   | 318         | 309         | 266   | 183         | 158   | 160   | 196         |
| CLIB 1245  | 306                                                               | 261         | 266         | 356   | 339         | 286   | 318         | 309         | 266   | 183         | 158   | 160   | 196         |
| CLIB 1246  | 306                                                               | 261         | 266         | 356   | 339         | 286   | 318         | 309         | 266   | 183         | 158   | 160   | 196         |
| CLIB 1247  | 306                                                               | 261         | 266         | 356   | 339         | 286   | 318         | 309         | 266   | 183         | 158   | 160   | 196         |
| CLIB 1248  | 299                                                               | 383         | 266         | 356   | 339         | 265   | 307         | 309         | 260   | 183         | 158   | 160   | 196         |
| CLIB 1249  | 317                                                               | 348         | 266         | 354   | 374         | 283   | 307         | 309         | 257   | 189         | 158   | 160   | 185,<br>196 |
| CLIB 1251  | 322                                                               | 342         | 266         | 354   | 374         | 265   | 307         | 309         | 257   | 189         | 158   | 163   | 196         |
| CLIB 1252  | 322                                                               | 342         | 266         | 354   | 374         | 265   | 307         | 309         | 257   | 189         | 158   | 163   | 196         |
| CLIB 1253  | 302                                                               | 261         | 266         | 356   | 339         | 265   | 318         | 309         | 266   | 183         | 158   | 160   | 196         |
| CLIB 1254  | 302                                                               | 261         | 266,<br>286 | 356   | 339         | 286   | 318         | 309         | 266   | 183         | 158   | 160   | 196         |
| CLIB 1255  | 302                                                               | 261         | 266         | 356   | 339         | 265   | 318         | 309         | 266   | 183         | 158   | 160   | 196         |
| CLIB 1256  | 302                                                               | 261         | 286         | 356   | 339         | 265   | 318         | 309         | 266   | 183         | 158   | 160   | 196         |
| CLIB 1257  | 293                                                               | 691         | 266         | 319   | 339         | 283   | 307         | 309         | 257   | 189         | 158   | 154   | 196         |

|           |             |             |     |             |             |             |             |     |             |             |     |     |     |
|-----------|-------------|-------------|-----|-------------|-------------|-------------|-------------|-----|-------------|-------------|-----|-----|-----|
| CLIB 1258 | 296         | 261         | 266 | 370         | 363         | 283         | 321         | 309 | 266         | 189         | 158 | 142 | 196 |
| CLIB 1260 | 293         | 710         | 266 | 319         | 339         | 283         | 307         | 309 | 257         | 189         | 158 | 154 | 196 |
| CLIB 1262 | 296         | 348         | 266 | 319         | 339         | 283         | 312         | 309 | 288         | 183         | 158 | 151 | 196 |
| CLIB 1263 | 293         | 342         | 266 | 354         | 374         | 283         | 307         | 309 | 288         | 189         | 158 | 163 | 196 |
| CLIB 1267 | 293         | 388         | 266 | 356         | 339         | 265         | 307         | 309 | 257         | 183         | 158 | 160 | 196 |
| CLIB 1270 | 293         | 345         | 266 | 356         | 339         | 283         | 312         | 309 | 266         | 183         | 158 | 160 | 196 |
| CLIB 1274 | 309         | 301         | 266 | 356         | 339         | 265         | 307         | 309 | 257         | 189         | 158 | 163 | 196 |
| CLIB 1283 | 302         | 323         | 266 | 356         | 339         | 265         | 307         | 309 | 266         | 236         | 158 | 160 | 196 |
| CLIB 1284 | 312         | 338         | 266 | 319         | 374         | 283         | 307         | 309 | 257         | 183         | 158 | 160 | 196 |
| CLIB 1285 | 296         | 504         | 266 | 356         | 363         | 283         | 318         | 309 | 257         | 189         | 158 | 160 | 196 |
| CLIB 918  | 296         | 348         | 266 | 319         | 339         | 283         | 312         | 309 | 288         | 183         | 158 | 151 | 196 |
| CNRZ 818  | 299         | 484         | 266 | 324         | 310         | 283         | 307         | 309 | 266         | 183         | 158 | 151 | 196 |
| CNRZ 819  | 296         | 461         | 266 | 356         | 339         | 265         | 307         | 309 | 257         | 183         | 158 | 160 | 196 |
| CNRZ 820  | 319         | 261         | 266 | 319         | 363         | 283         | 307         | 309 | 288         | 189         | 158 | 160 | 196 |
| CNRZ 821  | 299         | 477         | 266 | 324         | 310         | 283         | 307         | 309 | 266         | 183         | 158 | 151 | 196 |
| CNRZ 822  | 302         | 261         | 266 | 356         | 339         | 265         | 318         | 305 | 266         | 183         | 158 | 160 | 196 |
| CNRZ 823  | 293         | 357         | 266 | 354         | 374         | 283         | 307         | 309 | 266         | 189         | 158 | 145 | 196 |
| DSM 10452 | 293         | 423         | 266 | 313         | 383         | 283         | 312         | 316 | 257         | 183         | 158 | 92  | 196 |
| DSM 13629 | 293         | 261         | 274 | 313         | 363         | 286         | 312         | 309 | 266         | 219         | 158 | 154 | 196 |
| EL13-B1-3 | 302         | 261         | 266 | 356         | 339,<br>374 | 286         | 318         | 309 | 266         | 183         | 158 | 160 | 196 |
| FM 03     | 293         | 261         | 266 | 370         | 363         | 283         | 318         | 309 | 257         | 189         | 158 | 92  | 196 |
| FM 115    | 299         | 477         | 266 | 350         | 366         | 283         | 312         | 309 | 266         | 207         | 158 | 92  | 196 |
| FM 119    | 293,<br>302 | 323         | 266 | 356,<br>370 | 339,<br>363 | 265,<br>283 | 307,<br>318 | 309 | 257,<br>266 | 189,<br>227 | 158 | 145 | 196 |
| FM 12     | 302         | 261         | 266 | 356         | 339         | 286         | 318         | 309 | 266         | 183         | 158 | 160 | 196 |
| FM 122    | 296         | 255         | 266 | 368         | 363         | 283         | 312         | 296 | 266         | 189         | 158 | 92  | 196 |
| FM 125    | 293         | 388         | 266 | 359         | 339         | 265         | 307         | 309 | 257         | 183         | 158 | 160 | 192 |
| FM 136    | 296         | 380         | 266 | 313         | 310         | 265         | 307         | 301 | 266         | 189         | 158 | 160 | 196 |
| FM 212    | 290         | 261         | 266 | 350         | 363         | 283         | 318         | 309 | 266         | 207         | 158 | 105 | 196 |
| FM 213    | 293         | 247,<br>380 | 266 | 319         | 339         | 283         | 318         | 309 | 288         | 183         | 158 | 151 | 196 |
| FM 214    | 293         | 380         | 266 | 319         | 339         | 283         | 318         | 309 | 288         | 183         | 158 | 151 | 196 |
| FM 267    | 299         | 247,<br>392 | 266 | 356         | 339         | 265         | 312         | 309 | 257         | 183         | 158 | 145 | 196 |
| FM 268    | 293         | 392         | 266 | 359         | 339         | 265         | 307         | 309 | 257         | 186         | 158 | 160 | 196 |
| FM 269    | 293         | 474         | 266 | 356         | 310         | 283         | 307         | 309 | 266         | 183         | 158 | 151 | 196 |
| FM 270    | 306         | 535         | 266 | 356         | 339         | 265         | 309         | 309 | 257         | 236         | 158 | 160 | 196 |
| FM 29     | 306         | 261         | 266 | 356         | 339         | 265         | 318         | 309 | 266         | 183         | 158 | 160 | 196 |

|                           |     |     |     |     |     |     |     |             |     |     |     |     |     |
|---------------------------|-----|-----|-----|-----|-----|-----|-----|-------------|-----|-----|-----|-----|-----|
| FM 30                     | 299 | 530 | 266 | 313 | 339 | 283 | 312 | 309         | 266 | 183 | 158 | 145 | 196 |
| FM 31                     | 302 | 261 | 266 | 356 | 339 | 286 | 318 | 309         | 266 | 183 | 158 | 160 | 196 |
| FM 34                     | 293 | 388 | 266 | 359 | 339 | 265 | 307 | 309         | 257 | 183 | 158 | 160 | 196 |
| FM 76                     | 299 | 439 | 266 | 324 | 310 | 283 | 307 | 309         | 266 | 183 | 158 | 151 | 196 |
| FM 77                     | 299 | 477 | 266 | 324 | 310 | 283 | 307 | 309         | 266 | 183 | 158 | 151 | 196 |
| LCP 51.590<br>(CLIB 1415) | 293 | 261 | 266 | 370 | 363 | 283 | 312 | 309         | 277 | 224 | 158 | 92  | 196 |
| MUCL 11539                | 322 | 261 | 266 | 307 | 363 | 283 | 312 | 309,<br>321 | 277 | 216 | 158 | 145 | 196 |
| MUCL 14462                | 306 | 292 | 271 | 442 | 360 | 315 | 275 | 290         | 277 | 290 | 158 | 216 | 206 |
| MUCL 8652                 | 293 | 261 | 166 | 213 | 366 | 192 | 318 | 309         | 188 | 105 | 158 | 92  | 139 |
| MUCL 881                  | 296 | 364 | 266 | 356 | 374 | 265 | 312 | 309         | 257 | 251 | 158 | -   | 196 |
| NBRC 5368                 | 290 | 261 | 266 | 313 | 366 | 283 | 289 | 309         | 266 | 189 | 158 | -   | 196 |
| NCYC 49                   | 312 | 662 | 266 | 319 | 374 | 265 | 312 | 309         | 266 | 183 | 158 | 145 | 196 |
| NT 12                     | 378 | 355 | 292 | 386 | 354 | 269 | 332 | 290         | 253 | 210 | 158 | -   | 226 |
| VTTC 4559                 | 293 | 261 | 278 | 354 | 363 | 283 | 312 | 309         | 266 | 219 | 158 | 145 | 211 |

\*) Where two values are indicated for a given strain and locus, it is probable that the strain is diploid heterozygous at least for this locus. Where one value is given, no conclusion may be drawn concerning the ploidy of the strain.
