# Supplementary material for: Molecular Genetic Analysis with Microsatellite-like Loci Reveals Specific Dairy-Associated and Environmental Populations of the Yeast Geotrichum candidum
Source: MDPI journal article supplement (doi:10.3390/microorganisms10010103), 2022-01-04
Supplement: s1 [file s1]

**Table S2.** Lengths of microsatellite loci, raw data.

| Strain     | Length (measured) of amplicon produced at the microsatellite locus |                   |                   |        |                   |        |                   |                  |        |                   |        |         |                   |
|------------|--------------------------------------------------------------------|-------------------|-------------------|--------|-------------------|--------|-------------------|------------------|--------|-------------------|--------|---------|-------------------|
|            | ML005                                                              | ML007             | ML011             | ML013  | ML027             | ML037  | ML041             | ML047            | ML055  | ML067             | ML069  | ML075 * | ML097             |
| CBS 11176  | 292.59                                                             | 414.15            | 265.71            | 356.44 | 338.85            | 265.33 | 306.5             | 309.25           | 223.03 | 183.03            | 158.67 | 160.56  | 195.47            |
| CBS 11628  | 421.96                                                             | 393.37            | 291.89            | 386.16 | 350.88            | 259.16 | 318.00            | 289.61           | 252.46 | 206.71            | 158.55 | -       | 262.62            |
| CBS 117138 | 292.82                                                             | 260.83            | 277.44            | 353.26 | 362.67            | 283.06 | 312.49            | 309.14           | 266.54 | 201.27            | 155.34 | -       | 195.46            |
| CBS 178.71 | 285.82                                                             | 241.11/<br>276.69 | 265.66            | 391.97 | 336.01/<br>374.35 | 288.8  | 312.61            | 295.6/<br>308.29 | 267.35 | 171.28/<br>215.55 | 157.29 | 143.73  | 264.51            |
| CBS 182.33 | 299.63                                                             | 464.50            | 265.72            | 356.32 | 338.91            | 265.34 | 318.29            | 309.21           | 256.55 | 182.87            | 158.29 | 160.00  | 195.53            |
| CBS 476.83 | 452.82                                                             | 308.21            | 294.89            | 389.04 | 350.76            | 259.12 | 321.23            | 289.75           | 252.44 | 269.05            | 158.11 | -       | 225.92            |
| CBS 557.83 | 393.59                                                             | 344.68            | 286.04            | 380.36 | 350.82            | 259.16 | 315.3             | 289.59           | 252.55 | 180.06            | 158.38 | -       | 238.27            |
| CBS 615.84 | 292.9/<br>296.96                                                   | 360.71/<br>461.51 | 266.49            | 356.43 | 338.91/<br>374.39 | 266.05 | 306.29            | 309.12           | 257.73 | 183.14/<br>260.15 | 159.29 | 160.32  | 196.39            |
| CBS 9194   | 301.75                                                             | 282.00            | 279.62            | 327.83 | 359.81            | 303.41 | 274.59            | 280.24           | 328.12 | 336.82            | 158.45 | 144.66  | 205.52            |
| CLIB 1154  | 459.10                                                             | 452.83            | 294.96            | 388.69 | 351.22            | 287.13 | 332.45            | 289.93           | 252.58 | 212.86            | 157.22 | -       | 259.39            |
| CLIB 1235  | 312.05                                                             | 338.62            | 266.17            | 356.42 | 338.99            | 265.75 | 306.94/<br>365.41 | 309.35           | 258.3  | 182.84            | 152.22 | 160.40  | 19.006            |
| CLIB 1236  | 299.58                                                             | 342.02            | 265.62            | 356.37 | 374.38            | 265.26 | 312.31            | 309.25           | 256.43 | 182.96            | 158.53 | 163.68  | 195.32            |
| CLIB 1237  | 296.45                                                             | 366.81            | 265.69            | 359.33 | 374.33            | 283.05 | 306.75            | 309.4            | 257.54 | 189.34            | 158.47 | 144.75  | 195.28            |
| CLIB 1239  | 292.78                                                             | 363.86            | 265.60            | 353.59 | 338.88            | 282.96 | 306.69            | 309.27           | 267.40 | 182.99            | 158.54 | 144.65  | 195.31            |
| CLIB 1240  | 302.70                                                             | 260.80            | 265.87            | 356.42 | 338.97            | 286.17 | 318.26            | 309.20           | 266.81 | 182.92            | 158.37 | 160.42  | 195.69            |
| CLIB 1241  | 292.71                                                             | 363.80            | 265.61            | 353.53 | 338.93            | 282.95 | 306.80            | 309.20           | 266.42 | 182.92            | 158.39 | 145.00  | 195.33            |
| CLIB 1242  | 302.71                                                             | 261.00            | 265.59            | 356.37 | 338.98            | 265.23 | 318.19            | 309.34           | 266.33 | 182.96            | 158.39 | 160.44  | 195.31            |
| CLIB 1243  | 302.68                                                             | 261.25            | 265.60            | 356.36 | 339.06            | 265.24 | 318.01            | 309.27           | 266.35 | 183.06            | 158.56 | 160.33  | 195.31            |
| CLIB 1244  | 305.86                                                             | 260.88            | 265.61            | 356.30 | 339.00            | 285.88 | 318.22            | 309.34           | 266.39 | 183.02            | 158.49 | 160.00  | 195.36            |
| CLIB 1245  | 305.85                                                             | 261.04            | 265.61            | 356.38 | 339.08            | 285.90 | 318.21            | 309.38           | 266.36 | 182.99            | 158.44 | 160.34  | 195.3             |
| CLIB 1246  | 305.87                                                             | 260.95            | 265.95            | 355.43 | 339.03            | 285.22 | 318.22            | 309.42           | 266.91 | 182.84            | 158.38 | 160.39  | 195.68            |
| CLIB 1247  | 305.95                                                             | 261.27            | 265.55            | 356.38 | 339.09            | 285.83 | 318.1             | 309.33           | 266.27 | 182.95            | 158.49 | 160.43  | 195.3             |
| CLIB 1248  | 299.64                                                             | 382.77            | 265.85            | 356.5  | 339.00            | 265.45 | 306.84            | 309.41           | 259.81 | 182.92            | 158.42 | 160.46  | 195.6             |
| CLIB 1249  | 317.47                                                             | 347.05            | 266.21            | 353.93 | 374.78            | 284.05 | 307.50            | 309.55           | 257.46 | 188.07            | 157.14 | 160.16  | 185.18/<br>195.12 |
| CLIB 1251  | 321.65                                                             | 341.9             | 265.99            | 353.64 | 374.45            | 265.58 | 306.78            | 309.35           | 256.96 | 189.28            | 158.46 | 163.51  | 195.73            |
| CLIB 1252  | 322.11                                                             | 342.1             | 265.58            | 353.52 | 374.42            | 265.22 | 306.56            | 309.45           | 256.32 | 189.08            | 158.66 | 163.00  | 195.33            |
| CLIB 1253  | 302.75                                                             | 260.75            | 265.98            | 356.53 | 338.86            | 265.56 | 318.20            | 309.21           | 266.94 | 182.91            | 158.42 | 160.00  | 195.64            |
| CLIB 1254  | 302.02                                                             | 259.99            | 266.37/<br>286.72 | 356.58 | 338.92            | 285.79 | 318.05            | 309.22           | 267.71 | 183.53            | 158.74 | 159.32  | 196.14            |
| CLIB 1255  | 302.74                                                             | 261.08            | 265.57            | 356.35 | 339.01            | 265.21 | 318.19            | 309.36           | 266.28 | 182.96            | 158.45 | 160.52  | 195.31            |
| CLIB 1256  | 302.66                                                             | 261.14            | 286.15            | 356.46 | 339.08            | 265.84 | 318.1             | 309.43           | 266.75 | 183.1             | 158.54 | 160.45  | 195.61            |
| CLIB 1257  | 292.50                                                             | 691.00            | 265.57            | 318.55 | 338.93            | 282.9  | 306.53            | 309.21           | 256.32 | 189.33            | 158.59 | 154.18  | 195.31            |
| CLIB 1258  | 295.96                                                             | 261.00            | 265.57            | 370.41 | 362.81            | 282.89 | 321.42            | 308.43           | 265.17 | 189.24            | 155.31 | 141.73  | 195.33            |
| CLIB 1260  | 292.47                                                             | 710.00            | 266.06            | 318.69 | 338.93            | 283.41 | 306.59            | 309.26           | 258.07 | 189.46            | 158.62 | 154.08  | 195.86            |
| CLIB 1262  | 296.57                                                             | 348.38            | 265.59            | 318.58 | 339.03            | 282.94 | 312.09            | 309.19           | 288.16 | 182.87            | 158.59 | 151.18  | 195.53            |
| CLIB 1263  | 292.55                                                             | 341.67            | 265.58            | 353.48 | 374.32            | 282.83 | 306.43            | 309.38           | 288.19 | 189.40            | 158.63 | 163.44  | 195.36            |
| CLIB 1267  | 292.55                                                             | 388.08            | 266.07            | 356.22 | 338.94            | 265.65 | 306.41            | 308.42           | 258.18 | 182.99            | 158.76 | 160.22  | 195.96            |
| CLIB 1270  | 293.36                                                             | 344.88            | 265.60            | 356.51 | 338.36            | 282.99 | 312.38            | 309.22           | 266.43 | 182.93            | 158.49 | 160.00  | 195.28            |
| CLIB 1274  | 308.94                                                             | 301.39            | 266.45            | 356.83 | 338.94            | 266.00 | 306.74            | 309.36           | 257.59 | 189.22            | 158.32 | 163.41  | 196.31            |
| CLIB 1283  | 302.93                                                             | 323.75            | 265.61            | 356.36 | 339.01            | 265.26 | 306.62            | 309.02           | 266.42 | 236.32            | 158.56 | 160.59  | 195.33            |
| CLIB 1284  | 311.26                                                             | 337.7             | 265.95            | 318.68 | 374.00            | 283.52 | 306.90            | 308.28           | 256.8  | 182.92            | 157.41 | 159.37  | 195.66            |
| CLIB 1285  | 296.32                                                             | 503.5             | 266.49            | 356.54 | 362.63            | 283.85 | 318.21            | 309.07           | 257.64 | 189.19            | 158.35 | 160.43  | 196.39            |
| CLIB 918   | 296.41                                                             | 348.04            | 265.56            | 318.76 | 338.93            | 283.29 | 312.45            | 309.32           | 288.76 | 182.82            | 158.37 | 151.09  | 195.59            |

|            |                   |                   |        |                  |                   |                  |                   |                   |                   |                   |        |        |        |
|------------|-------------------|-------------------|--------|------------------|-------------------|------------------|-------------------|-------------------|-------------------|-------------------|--------|--------|--------|
| CNRZ 818   | 299.93            | 483.56            | 266.34 | 324.46           | 309.77            | 283.73           | 306.59            | 309.56            | 267.47            | 183.02            | 158.90 | 151.27 | 196.15 |
| CNRZ 819   | 296.40            | 461.17            | 265.97 | 356.39           | 339.28            | 265.55           | 306.79            | 309.27            | 256.94            | 183.02            | 158.50 | 160.30 | 195.77 |
| CNRZ 820   | 318.51            | 260.76            | 265.66 | 318.55           | 362.59            | 283.02           | 306.69            | 309.25            | 288.36            | 189.38            | 158.47 | 160.33 | 195.50 |
| CNRZ 821   | 299.53            | 477.20            | 265.73 | 324.31           | 309.87            | 283.11           | 306.79            | 309.41            | 266.58            | 182.96            | 158.45 | 150.99 | 195.45 |
| CNRZ 822   | 302.74            | 261.13            | 265.59 | 356.47           | 339.01            | 265.48           | 318.2             | 305.35            | 266.83            | 182.94            | 158.43 | 160.5  | 195.65 |
| CNRZ 823   | 292.73            | 357.45            | 265.89 | 353.63           | 374.35            | 283.26           | 306.9             | 309.33            | 266.92            | 189.27            | 158.35 | 144.81 | 195.63 |
| DSM 10452  | 292.59            | 422.82            | 265.57 | 312.91           | 383.07            | 282.94           | 312.25            | 315.96            | 256.29            | 182.92            | 158.49 | 92.2   | 195.32 |
| DSM 13629  | 292.76            | 261.29            | 274.38 | 312.98           | 362.69            | 285.94           | 312.33            | 309.27            | 267.06            | 218.61            | 158.54 | 154.32 | 195.31 |
| EL13-B1-3  | 301.58            | 260.85            | 265.72 | 356.41           | 339.20/<br>374.66 | 286.23           | 318.6             | 309.54            | 266.56            | 182.9             | 157.24 | 160.26 | 195.43 |
| FM 03      | 292.67            | 260.92            | 266.47 | 370.42           | 362.6             | 283.85           | 318.22            | 308.22            | 258.62            | 189.21            | 155.33 | 92.11  | 196.3  |
| FM 115     | 298.45            | 477.05            | 265.84 | 350.43           | 365.54            | 283.14           | 312.30            | 308.28            | 265.53            | 206.78            | 158.54 | 92.12  | 195.55 |
| FM 119     | 292.19/<br>301.63 | 322.98            | 265.72 | 356.6/<br>370.56 | 339.15/<br>363.15 | 264.79/<br>283.3 | 306.96/<br>318.37 | 309.81            | 256.43/<br>266.45 | 189.26/<br>227.42 | 157.29 | 145.29 | 195.62 |
| FM 12      | 302.72            | 261.08            | 265.59 | 356.35           | 339.08            | 285.88           | 318.11            | 309.43            | 266.33            | 182.98            | 158.47 | 160.43 | 195.29 |
| FM 122     | 295.94            | 254.59            | 265.61 | 367.52           | 362.65            | 282.97           | 312.13            | 296.6             | 265.24            | 189.4             | 155.57 | 92.09  | 195.38 |
| FM 125     | 292.84            | 388.06            | 266.4  | 359.41           | 338.77            | 265.96           | 306.59            | 309.16            | 257.58            | 183.08            | 159.05 | 160.42 | 192.29 |
| FM 136     | 295.40            | 379.54            | 265.65 | 312.97           | 309.35            | 265.29           | 307.12            | 301.12            | 265.67            | 188.72            | 155.35 | 160.32 | 195.31 |
| FM 212     | 289.92            | 260.91            | 265.59 | 350.43           | 362.71            | 282.94           | 318.3             | 309.33            | 267.08            | 206.64            | 155.2  | 104.52 | 195.4  |
| FM 213     | 291.51            | 247.08/<br>379.43 | 265.97 | 318.76           | 339.27            | 283.55           | 318.73            | 309.46            | 289.00            | 183.05            | 158.09 | 150.86 | 195.63 |
| FM 214     | 292.49            | 379.69            | 265.65 | 318.12           | 339.07            | 283.00           | 317.99            | 309.39            | 288.23            | 183.04            | 158.45 | 151.02 | 195.3  |
| FM 267     | 298.45            | 246.74/<br>392.02 | 265.08 | 356.49           | 339.11            | 265.91           | 313.09            | 309.32            | 257.17            | 181.91            | 158.12 | 144.24 | 195.77 |
| FM 268     | 292.46            | 391.5             | 265.62 | 359.2            | 339.06            | 265.26           | 306.99            | 309.35            | 256.42            | 185.93            | 158.47 | 160.48 | 195.31 |
| FM 269     | 292.83            | 473.95            | 265.51 | 356.48           | 309.51            | 282.86           | 307.11            | 309.43            | 266.33            | 182.89            | 158.36 | 151.04 | 195.37 |
| FM 270     | 305.81            | 535.37            | 265.63 | 356.34           | 338.97            | 265.27           | 308.84            | 309.38            | 256.45            | 236.25            | 158.41 | 160.39 | 195.34 |
| FM 29      | 306.37            | 260.99            | 265.63 | 356.36           | 338.99            | 265.27           | 317.69            | 309.37            | 266.42            | 182.61            | 158.70 | 160.42 | 195.32 |
| FM 30      | 299.64            | 529.78            | 265.59 | 312.88           | 339.04            | 282.94           | 312.25            | 309.24            | 265.26            | 182.91            | 158.43 | 144.88 | 195.46 |
| FM 31      | 302.84            | 261.07            | 266.00 | 356.43           | 339.03            | 286.29           | 318.09            | 309.32            | 266.99            | 182.92            | 158.47 | 160.42 | 195.77 |
| FM 34      | 292.59            | 388.18            | 265.83 | 359.47           | 339.03            | 265.44           | 306.82            | 309.38            | 256.75            | 182.99            | 158.45 | 160.43 | 195.61 |
| FM 76      | 299.68            | 438.77            | 265.68 | 324.25           | 309.73            | 283.03           | 306.72            | 309.31            | 266.45            | 182.93            | 158.50 | 151.01 | 195.35 |
| FM 77      | 299.41            | 477.38            | 265.81 | 324.23           | 309.52            | 283.14           | 306.65            | 309.32            | 266.68            | 183.12            | 158.67 | 151.10 | 195.48 |
| LCP 51.590 | 293.20            | 261.07            | 265.59 | 370.46           | 362.74            | 282.95           | 312.39            | 309.39            | 277.25            | 224.49            | 155.31 | 92.19  | 195.27 |
| MUCL 11539 | 322.71            | 261.28            | 265.64 | 307.23           | 362.63            | 282.97           | 312.24            | 309.28/<br>320.84 | 277.23            | 215.62            | 158.75 | 144.99 | 195.42 |
| MUCL 14462 | 304.88            | 292.16            | 270.81 | 442.09           | 359.92            | 315.17           | 274.55            | 290.82            | 275.91            | 289.83            | 158.55 | 216.17 | 205.78 |
| MUCL 8652  | 292.87            | 260.92            | 165.67 | 212.75           | 365.45            | 191.77           | 317.37            | 308.59            | 188.39            | 105.09            | 156.3  | 92.10  | 138.51 |
| MUCL 881   | 296.03            | 363.95            | 265.63 | 356.55           | 374.47            | 265.28           | 312.52            | 309.17            | 256.42            | 250.89            | 158.39 | -      | 195.28 |
| NBRC 5368  | 289.87            | 260.88            | 265.8  | 314.14           | 365.51            | 283.27           | 289.25            | 308.27            | 265.68            | 189.25            | 155.24 | -      | 195.60 |
| NCYC 49    | 312.02            | 662.00            | 265.63 | 318.56           | 374.36            | 265.27           | 312.20            | 309.33            | 266.39            | 183.00            | 158.39 | 144.75 | 195.37 |
| NT 12      | 378.13            | 355.21            | 292.49 | 386.42           | 353.75            | 268.51           | 331.71            | 289.71            | 253.49            | 210.04            | 159.25 | -      | 226.89 |
| VTTC 4559  | 292.87            | 260.73            | 277.60 | 353.31           | 362.68            | 283.25           | 312.08            | 309.37            | 265.7             | 218.57            | 155.45 | 144.80 | 210.90 |

\*) “-” : No PCR product was seen in a small proportion of cases. In this case the sequences flanking the locus MLO75 are presumably less conserved than those of other loci.
