# Supplementary material for: Molecular Genetic Analysis with Microsatellite-like Loci Reveals Specific Dairy-Associated and Environmental Populations of the Yeast Geotrichum candidum
Source: MDPI journal article supplement (doi:10.3390/microorganisms10010103), 2022-01-04
Supplement: s1 [file s1]

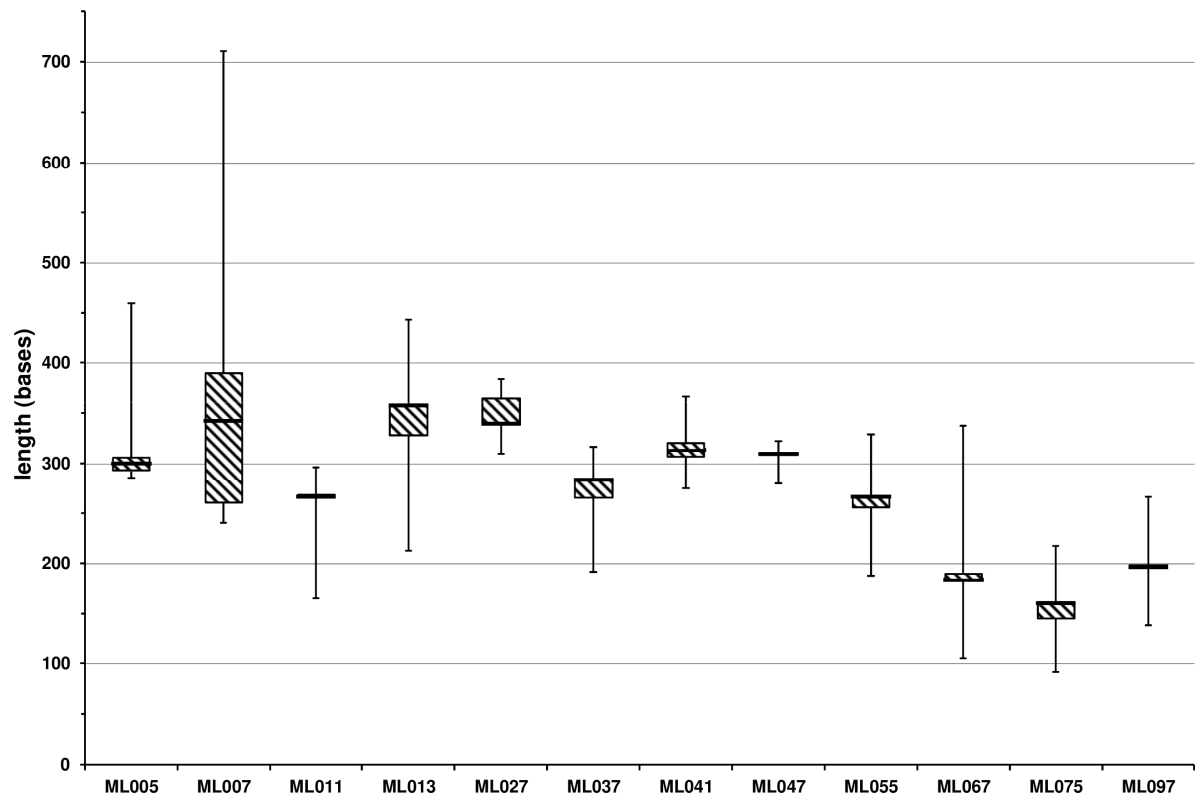

**Figure S1.** Distribution of amplicon lengths for the chosen microsatellite-like loci in the tested strains.
