# Supplementary figures and images for: Molecular Genetic Analysis with Microsatellite-like Loci Reveals Specific Dairy-Associated and Environmental Populations of the Yeast Geotrichum candidum
Source: MDPI journal article supplement (doi:10.3390/microorganisms10010103), 2022-01-04

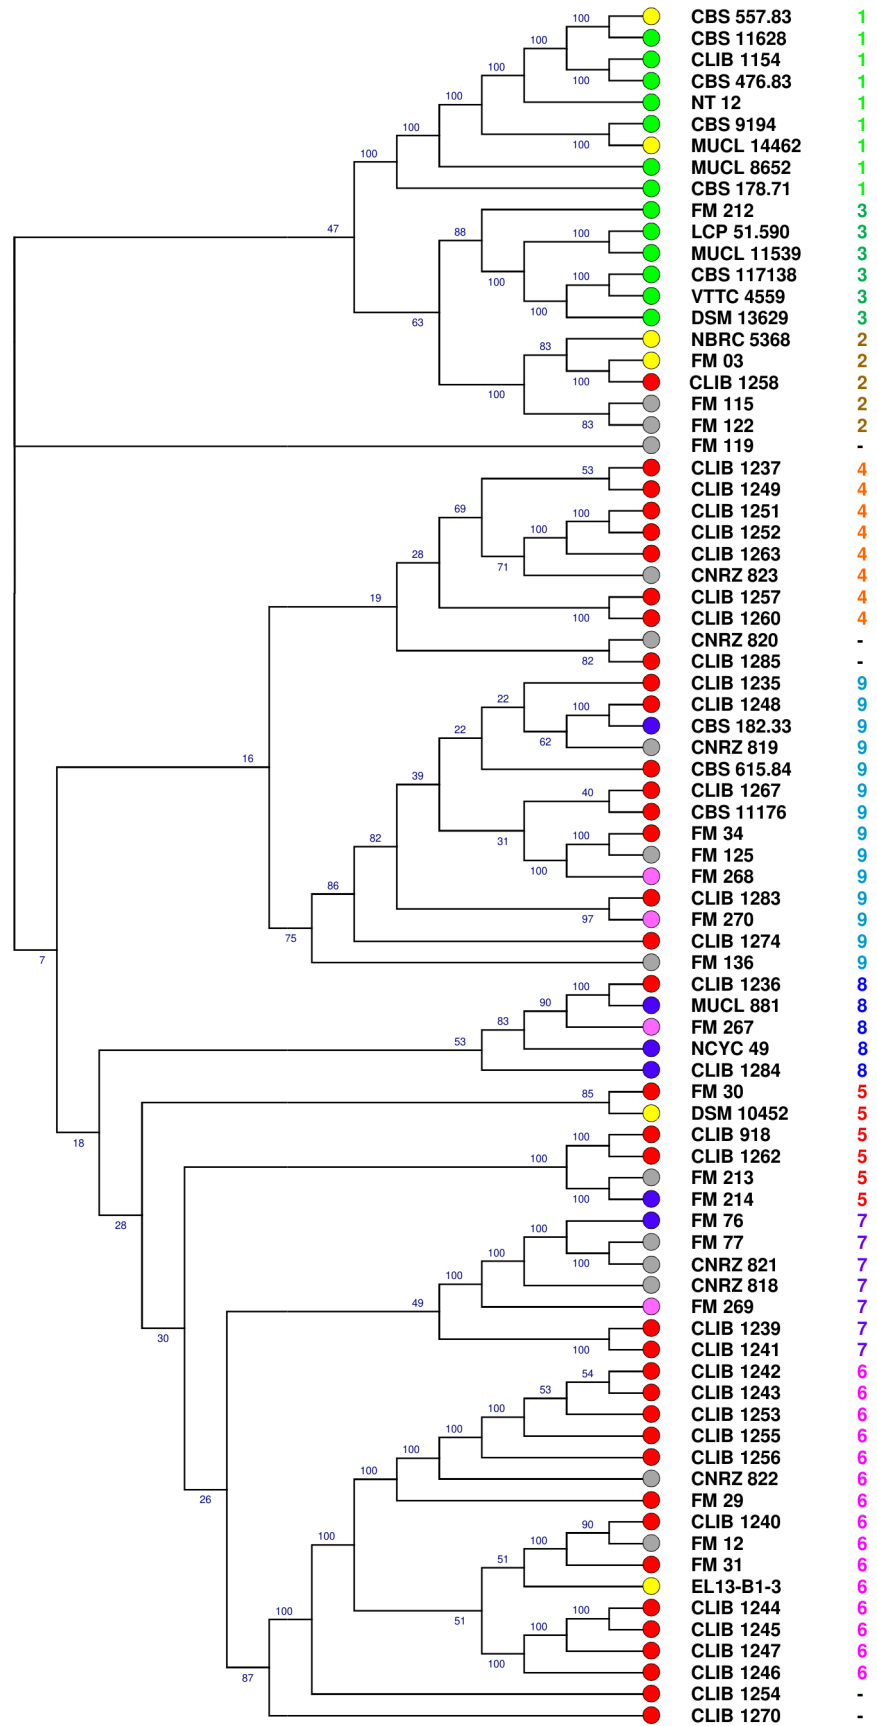

**Figure S2.** Phylogeny of the *G. candidum* strains, average of random haploid genotypes.

Supplement: s1 [file s1]
